# Supplementary material
Source: HighWire-hosted journal article supplement (http://www.qdcxjkg.com/highwire/filestream/113606/field_highwire_adjunct_files/10/patient_info__-_tests_conducted_in_tb_clinics_-_french.pdf)
Supplement: patient_info__-_tests_conducted_in_tb_clinics_-_french.pdf [file patient_info__-_tests_conducted_in_tb_clinics_-_french.pdf]

# Tests effectués dans les cliniques spécialisées dans la tuberculose

Patient information:

HIV testing in TB clinics (French)

## Radiographie de la poitrine

Cet examen est réalisé pour vérifier si vous souffrez de tuberculose des poumons. Il peut être répété plus tard pour vérifier que votre traitement est efficace.

## Analyse du crachat/flegme

On pourra vous demander de fournir des échantillons de crachat pour vérifier si vous souffrez de tuberculose des poumons. Cette analyse pourra être répétée plus tard pour vérifier que votre traitement est efficace.

## Analyses de sang

Les analyses de sang peuvent révéler si vous êtes anémique ou si vous avez une infection. Ces analyses sont parfois répétées après le début du traitement pour vérifier que l'infection disparaît.

D'autres analyses sont réalisées afin de savoir comment fonctionnent votre foie et vos reins avant et pendant le traitement. Ces analyses sont importantes car certains médicaments peuvent avoir une influence sur le fonctionnement de votre foie et de vos reins.

## Tests pour dépister d'autres infections

Nous proposons un test de dépistage du VIH à toutes les personnes qui se présentent à une clinique spécialisée dans la tuberculose. Comme le VIH endommage les systèmes de défense du corps, la tuberculose peut s'installer plus facilement. Il existe de bons traitements pour le VIH qui pourront améliorer votre santé.

## Tests pour dépister d'autres infections

Nous pouvons aussi effectuer des tests pour dépister l'hépatite B et l'hépatite C. Ces infections peuvent modifier le fonctionnement de votre foie et influencer votre traitement pour la tuberculose. Si le test est positif, vous pourrez être orienté vers une équipe spécialisée.

## Confidentialité

Les résultats de tous vos tests sont traités de manière confidentielle et les informations sont uniquement communiquées aux professionnels de la santé qui s'occupent directement de vos soins.

## Informations complémentaires

### VIH

NAHIP : [www.nahip.org.uk](http://www.nahip.org.uk)

Do It Right :

[www.doitright.uk.com](http://www.doitright.uk.com)

THT : [www.tht.org.uk](http://www.tht.org.uk)

### Tuberculose

NKS TB :

[www.hpa.org.uk/tbknowledge](http://www.hpa.org.uk/tbknowledge)

TB Alert : [www.tbalert.org](http://www.tbalert.org)

### Autres sites utiles

NHS choices : [www.nhs.uk](http://www.nhs.uk)

Health Protection Agency :

[www.hpa.org.uk](http://www.hpa.org.uk)
